# Supplementary material for: Health professionals’ and caregivers’ perspectives on improving paramedics’ provision of palliative care in Australian communities: a qualitative study
Source: HighWire-hosted journal article supplement (doi:10.1136/bmjopen-2024-086557), 2024-09-01
Supplement: bmjopen-2024-086557supp001_data_supplement.pdf [file bmjopen-2024-086557supp001_data_supplement.pdf]

**Appendix 1:** Interview guide for health professionals**1. Opportunities for improvement**

- a) How can paramedics help reduce avoidable hospital admissions and better facilitate home-based deaths of community-based palliative care patients?
- b) How can multidisciplinary teams work together to better support paramedics caring for palliative and end-of-life patients in the community?
- c) What should be included in a paramedic's scope of practice when delivering palliative and end-of-life care in the community and why? **Prompt: consider the current scope of clinical practice guidelines and protocols and how they could be broadened.**
- d) How could paramedics best support families and carers if the patient dies while they are present? **Prompt: cultural rituals, bereavement support, verification of death, liaising with patient's medical team?**
- e) Beyond a palliative care-specific clinical practice guideline, how can palliative care become better integrated into ambulance services' core business? **Prompt: education and training, government policy and legislation, funding, research.**

**2. Other**

- a) Is there anything else you think may be important to add?

**Appendix 2: Interview guide for family members and carers****1. Opportunities for improvement**

- a) How do you think paramedics could help patients, and their families/carers avoid going into hospital when it isn't what the patient would want at the end-of-life?
- b) How can paramedics better support a terminally ill person to have a home-based death if this is what is desired?
- c) In your experience, how could ambulance services work more effectively with other health services to better support palliative patients and their families to stay at home at the end-of-life when this is what the person prefers? Why?
- d) How involved should paramedics be in caring for palliative patients and their families at home?  
What should they be offering and why? *Prompt: supporting patient's goals of care, medication delivery, family/carer support?*
- e) How could paramedics best support families and carers if the patient dies while they are present? *Prompt: cultural rituals, bereavement support, verification of death, liaising with patient's medical team?*

**2. Other**

- a) Is there anything else you that you think may be important to add?
